# Supplementary material for: Accuracy of Neck Circumference as a Screening Test for Cardiovascular Disease Risk.
Source: Research Square preprint supplement (doi:10.21203/rs.3.rs-1450578/v1), 2022-03-22
Supplement: Supplementary file 1 [file c433be439d04a703b8751f0a.docx]

**Appendix 3; Tables of neck circumferences with their respective specificities and sensitivities.**

**Table 3a: Table showing how the overall cut off of neck circumference (Bold red figures) is read off from the table**

| **Cut off point** | **Sensitivity** | **Specificity** | **1-Specificity** | **Classified** | **LR+** | **LR-** |
| --- | --- | --- | --- | --- | --- | --- |
| (>= 26) | 100.00% | 0.00% | 100.00% | 21.35% | 1 |  |
| (>= 28) | 100.00% | 0.33% | 99.67% | 21.61% | 1.003 | 0 |
| (>= 28.5) | 97.56% | 2.98% | 97.02% | 23.18% | 1.006 | 0.818 |
| (>= 29) | 97.56% | 4.30% | 95.70% | 24.22% | 1.02 | 0.567 |
| (>= 29.5) | 92.68% | 7.62% | 92.38% | 25.78% | 1.003 | 0.961 |
| (>= 30) | 92.68% | 9.27% | 90.73% | 27.08% | 1.022 | 0.789 |
| (>= 30.1) | 90.24% | 20.53% | 79.47% | 35.42% | 1.136 | 0.475 |
| (>= 30.5) | 90.24% | 20.86% | 79.14% | 35.68% | 1.14 | 0.468 |
| (>= 31) | 89.02% | 23.18% | 76.82% | 37.24% | 1.159 | 0.474 |
| (>= 31.5) | 81.71% | 33.77% | 66.23% | 44.01% | 1.234 | 0.542 |
| (>= 32) | 81.71% | 36.42% | 63.58% | 46.09% | 1.285 | 0.502 |
| (>= 32.2) | 68.29% | 48.34% | 51.66% | 52.60% | 1.322 | 0.656 |
| (>= 32.5) | 68.29% | 48.68% | 51.32% | 52.86% | 1.331 | 0.651 |
| (>= 33) | 67.07% | 49.67% | 50.33% | 53.39% | 1.333 | 0.663 |
| (>= 33.5) | 56.10% | 60.60% | 39.40% | 59.64% | 1.424 | 0.725 |
| (>= 34) | 53.66% | 63.25% | 36.75% | 61.20% | 1.46 | 0.733 |
| (>= 34.3) | 43.90% | 73.18% | 26.82% | 66.93% | 1.637 | 0.767 |
| (>= 34.5) | 43.90% | 73.51% | 26.49% | 67.19% | 1.657 | 0.763 |
| **(>= 35)** | **43.90%** | **75.17%** | **24.83%** | **68.49%** | **1.768** | **0.746** |
| (>= 35.3) | 34.15% | 84.44% | 15.56% | 73.70% | 2.194 | 0.78 |
| (>= 35.5 | 32.93% | 84.44% | 15.56% | 73.44% | 2.116 | 0.794 |
| (>= 36) | 31.71% | 85.76% | 14.24% | 74.22% | 2.227 | 0.796 |
| (>= 36.3) | 20.73% | 92.38% | 7.62% | 77.08% | 2.722 | 0.858 |
| (>= 36.5) | 19.51% | 92.38% | 7.62% | 76.82% | 2.562 | 0.871 |
| (>= 37) | 18.29% | 93.38% | 6.62% | 77.34% | 2.762 | 0.875 |
| (>= 38) | 8.54% | 96.36% | 3.64% | 77.60% | 2.344 | 0.949 |
| (>= 38.5) | 6.10% | 97.68% | 2.32% | 78.13% | 2.631 | 0.961 |
| (>= 39) | 6.10% | 98.01% | 1.99% | 78.39% | 3.069 | 0.958 |
| (>= 40) | 3.66% | 98.34% | 1.66% | 78.13% | 2.21 | 0.98 |
| (>= 42) | 0.00% | 99.01% | 0.99% | 77.86% | 0 | 1.01 |
| (>= 43.5) | 0.00% | 99.67% | 0.33% | 78.39% | 0 | 1.003 |
| (> 43.5) | 0.00% | 100.00% | 0.00% | 78.65% |  | 1 |
| Area Under ROC Curve (95%CI) = 0.63 (0.561 - 0.670) | | | | | | |

**Table 3b; Table of the different neck circumference of male participants with their respective sensitivities and specificities showing how the cut off was read off**

| **Cutoff point** | **Sensitivity** | **Specificity** | **1- Specificity** | **Classified** | **LR+** | **LR-** |
| --- | --- | --- | --- | --- | --- | --- |
| (>= 29) | 100.00% | 0.00% | 100.00% | 24.24% | 1 |  |
| (>= 30) | 100.00% | 1.33% | 98.67% | 25.25% | 1.0135 | 0 |
| (>= 31) | 100.00% | 2.67% | 97.33% | 26.26% | 1.0274 | 0 |
| (>= 31.5) | 91.67% | 4.00% | 96.00% | 25.25% | 0.9549 | 2.0833 |
| (>= 32) | 91.67% | 5.33% | 94.67% | 26.26% | 0.9683 | 1.5625 |
| (>= 32.5) | 87.50% | 10.67% | 89.33% | 29.29% | 0.9795 | 1.1719 |
| (>= 33) | 83.33% | 12.00% | 88.00% | 29.29% | 0.947 | 1.3889 |
| (>= 33.5) | 75.00% | 20.00% | 80.00% | 33.33% | 0.9375 | 1.25 |
| (>= 34) | 75.00% | 25.33% | 74.67% | 37.37% | 1.0045 | 0.9868 |
| (>= 34.5) | 75.00% | 36.00% | 64.00% | 45.45% | 1.1719 | 0.6944 |
| (>= 35) | 75.00% | 41.33% | 58.67% | 49.49% | 1.2784 | 0.6048 |
| (>= 35.5) | 66.67% | 58.67% | 41.33% | 60.61% | 1.6129 | 0.5682 |
| (>= 36) | 62.50% | 61.33% | 38.67% | 61.62% | 1.6164 | 0.6114 |
| **(>= 36.3)** | **45.83%** | **77.33%** | **22.67%** | **69.70%** | **2.0221** | **0.7004** |
| (>= 36.5) | 41.67% | 77.33% | 22.67% | 68.69% | 1.8382 | 0.7543 |
| (>= 37) | 37.50% | 81.33% | 18.67% | 70.71% | 2.0089 | 0.7684 |
| (>= 38) | 25.00% | 89.33% | 10.67% | 73.74% | 2.3437 | 0.8396 |
| (>= 38.5) | 16.67% | 92.00% | 8.00% | 73.74% | 2.0833 | 0.9058 |
| (>= 39) | 16.67% | 93.33% | 6.67% | 74.75% | 2.5 | 0.8929 |
| (>= 40) | 8.33% | 94.67% | 5.33% | 73.74% | 1.5625 | 0.9683 |
| (>= 42) | 0.00% | 97.33% | 2.67% | 73.74% | 0 | 1.0274 |
| (>= 43.5) | 0.00% | 98.67% | 1.33% | 74.75% | 0 | 1.0135 |
| (> 43.5) | 0.00% | 100.00% | 0.00% | 75.76% |  | 1 |
| Area=0.612 (0.469 - 0.756) | | | | | | |

**Table 3C; Table of the different neck circumference of female participants with their respective sensitivities and specificities showing how the cut off was read off**

| **Cutoff point** | **Sensitivity** | **Specificity** | **1- Specificity** | **Classified** | **LR+** | LR- |
| --- | --- | --- | --- | --- | --- | --- |
| (>= 26) | 100.00% | 0.00% | 100.00% | 20.35% | 1 |  |
| (>= 28) | 100.00% | 0.44% | 99.56% | 20.70% | 1.0044 | 0 |
| (>= 28.5) | 96.55% | 3.96% | 96.04% | 22.81% | 1.0054 | 0.8697 |
| (>= 29) | 96.55% | 5.73% | 94.27% | 24.21% | 1.0242 | 0.6021 |
| (>= 29.5) | 89.66% | 9.69% | 90.31% | 25.96% | 0.9928 | 1.0674 |
| (>= 30) | 89.66% | 11.89% | 88.11% | 27.72% | 1.0176 | 0.8697 |
| (>= 30.1) | 86.21% | 26.43% | 73.57% | 38.60% | 1.1718 | 0.5218 |
| (>= 30.5) | 86.21% | 26.87% | 73.13% | 38.95% | 1.1789 | 0.5133 |
| (>= 31) | 84.48% | 29.96% | 70.04% | 41.05% | 1.2061 | 0.518 |
| (>= 31.5) | 77.59% | 43.61% | 56.39% | 50.53% | 1.3759 | 0.5139 |
| (>= 32) | 77.59% | 46.70% | 53.30% | 52.98% | 1.4555 | 0.48 |
| (>= 32.2) | 60.34% | 60.79% | 39.21% | 60.70% | 1.5391 | 0.6523 |
| (>= 32.5) | 60.34% | 61.23% | 38.77% | 61.05% | 1.5566 | 0.6476 |
| (>= 33) | 60.34% | 62.11% | 37.89% | 61.75% | 1.5928 | 0.6384 |
| **(>= 33.5)** | **48.28%** | **74.01%** | **25.99%** | **68.77%** | **1.8574** | **0.6989** |
| (>= 34) | 44.83% | 75.77% | 24.23% | 69.47% | 1.8502 | 0.7281 |
| (>= 34.3) | 31.03% | 85.46% | 14.54% | 74.39% | 2.1348 | 0.807 |
| (>= 34.5) | 31.03% | 85.90% | 14.10% | 74.74% | 2.2015 | 0.8028 |
| (>= 35) | 31.03% | 86.34% | 13.66% | 75.09% | 2.2725 | 0.7987 |
| (>= 35.3) | 20.69% | 92.95% | 7.05% | 78.25% | 2.9353 | 0.8532 |
| (>= 35.5) | 18.97% | 92.95% | 7.05% | 77.89% | 2.6907 | 0.8718 |
| (>= 36) | 18.97% | 93.83% | 6.17% | 78.60% | 3.0751 | 0.8636 |
| (>= 37) | 10.34% | 97.36% | 2.64% | 79.65% | 3.9138 | 0.9209 |
| (>= 38) | 1.72% | 98.68% | 1.32% | 78.95% | 1.3046 | 0.9959 |
| (>= 40) | 1.72% | 99.56% | 0.44% | 79.65% | 3.9138 | 0.9871 |
| (>= 42) | 0.00% | 99.56% | 0.44% | 79.30% | 0 | 1.0044 |
| (> 42) | 0.00% | 100.00% | 0.00% | 79.65% |  | 1 |
| Area=0.648 (0.565 - 0.730) | | | | | | |
